# Supplementary material
Source: PubMed Central journal article supplement (PMC6535595)
Supplement: JCM.00203-19-s0002.pdf [file JCM.00203-19-s0002.pdf]

Figure S1. Proposed decision tree for revised breakpoint adoption on cASTs

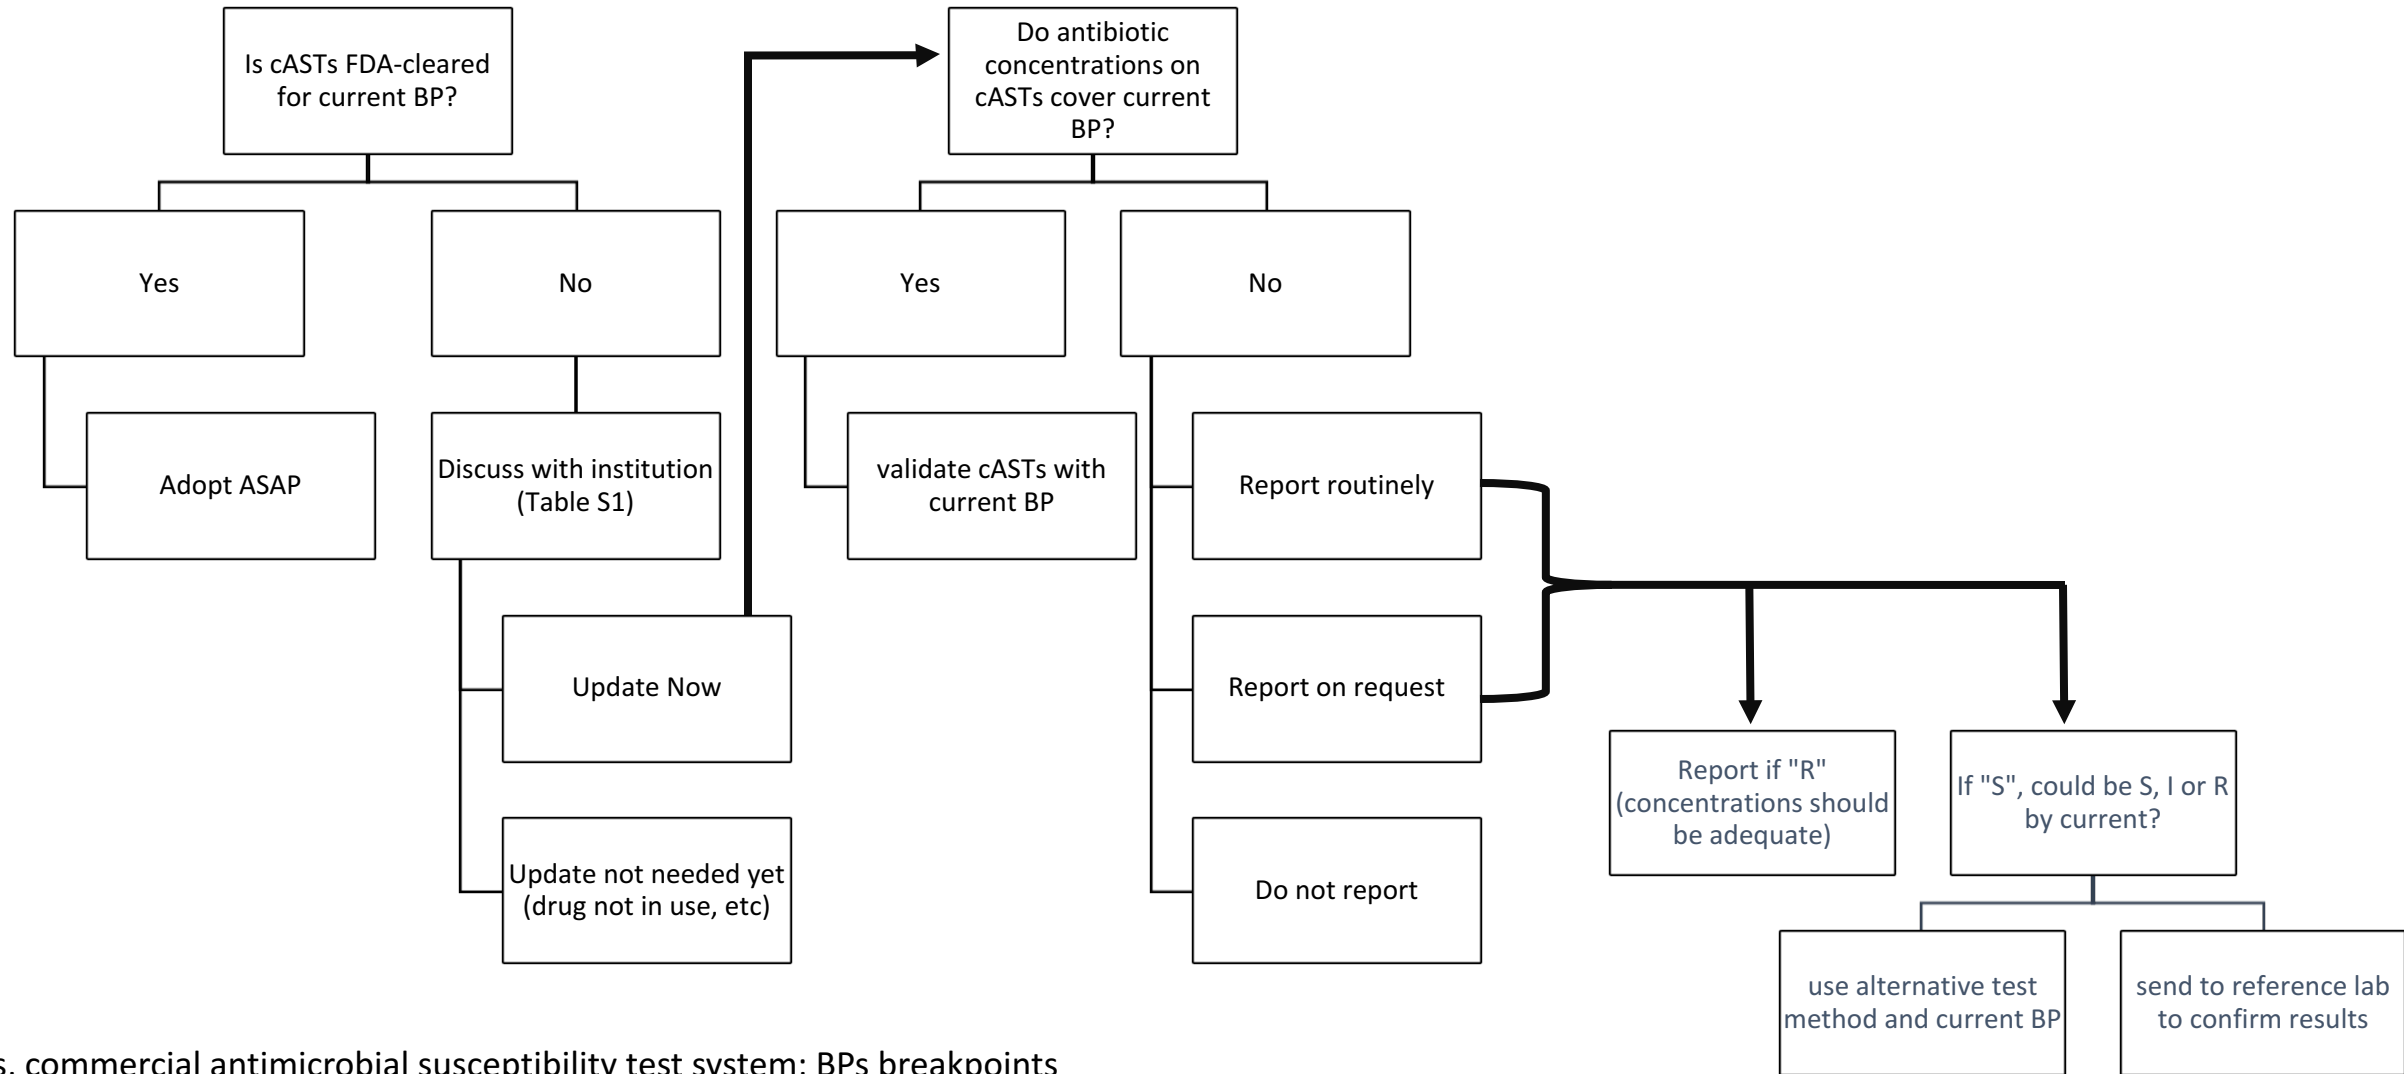

cASTs, commercial antimicrobial susceptibility test system; BPs breakpoints  
 Alternative test method options: disk diffusion (if test method appropriate for drug/organism combination); gradient diffusion; other
